# Supplementary material
Source: HighWire-hosted journal article supplement (https://jnm.snmjournals.org/highwire/filestream/93958/field_highwire_adjunct_files/0/jnm056226_suppl_tables.pdf)
Supplement: jnm056226_suppl_tables.pdf [file jnm056226_suppl_tables.pdf]

### Supplemental TABLE 1

Human residence times for  $^{11}\text{C}$ -dLop extrapolated from rhesus monkeys

| Source Organ      | Residence time (h) |   |       |                    |   |       |
|-------------------|--------------------|---|-------|--------------------|---|-------|
|                   | Baseline (n=4)     |   |       | P-gp blocked (n=3) |   |       |
| Brain             | 0.013              | ± | 0.005 | 0.021              | ± | 0.006 |
| Thyroid           | 0.006              | ± | 0.003 | 0.006              | ± | 0.003 |
| Lungs             | 0.096              | ± | 0.046 | 0.075              | ± | 0.037 |
| Liver             | 0.187              | ± | 0.102 | 0.164              | ± | 0.056 |
| Kidney            | 0.029              | ± | 0.010 | 0.035              | ± | 0.003 |
| Remainder of Body | 0.160              | ± | 0.084 | 0.189              | ± | 0.024 |

Data represents mean ± SD

## Supplemental TABLE 2

Mean radiation dosimetry of  $^{11}\text{C}$ -dLop extrapolated from the baseline scans of four monkeys.

| Target Organ Doses    | $\mu\text{Sv}/\text{MBq}$       | mrem/mCi                       |
|-----------------------|---------------------------------|--------------------------------|
| Adrenals              | $4.4 \pm 0.5$                   | $16 \pm 1.7$                   |
| Brain                 | $3.1 \pm 1.3$                   | $12 \pm 4.9$                   |
| Breasts               | $1.8 \pm 0.3$                   | $7 \pm 1.0$                    |
| Gallbladder Wall      | $5.6 \pm 1.7$                   | $21 \pm 6.1$                   |
| LLI Wall              | $1.2 \pm 0.5$                   | $5 \pm 2.0$                    |
| Small Intestine       | $1.9 \pm 0.3$                   | $7 \pm 1.3$                    |
| Stomach Wall          | $2.3 \pm 0.2$                   | $9 \pm 0.7$                    |
| ULI Wall              | $2.2 \pm 0.3$                   | $8 \pm 0.9$                    |
| Heart Wall            | $3.2 \pm 0.2$                   | $12 \pm 0.8$                   |
| Kidneys               | $34 \pm 8.3$                    | $125 \pm 31$                   |
| Liver                 | $32 \pm 17$                     | $120 \pm 62$                   |
| Lungs                 | $26 \pm 11$                     | $95 \pm 42$                    |
| Muscle                | $1.7 \pm 0.3$                   | $6 \pm 1.2$                    |
| Ovaries               | $1.4 \pm 0.5$                   | $5 \pm 1.9$                    |
| Pancreas              | $3.7 \pm 0.3$                   | $14 \pm 1.1$                   |
| Red Marrow            | $1.8 \pm 0.2$                   | $7 \pm 0.9$                    |
| Osteogenic Cells      | $2.1 \pm 0.6$                   | $8 \pm 2.2$                    |
| Skin                  | $1.2 \pm 0.3$                   | $4 \pm 1.2$                    |
| Spleen                | $2.4 \pm 0.4$                   | $9 \pm 1.6$                    |
| Testes                | $1.0 \pm 0.5$                   | $4 \pm 1.8$                    |
| Thymus                | $2.0 \pm 0.4$                   | $8 \pm 1.5$                    |
| Thyroid               | $67 \pm 34$                     | $247 \pm 126$                  |
| Urinary Bladder Wall  | $1.2 \pm 0.5$                   | $4 \pm 2.0$                    |
| Uterus                | $1.4 \pm 0.5$                   | $5 \pm 1.9$                    |
| Total Body            | $3.0 \pm 0.1$                   | $11 \pm 0.2$                   |
| <b>Effective Dose</b> | <b><math>9.4 \pm 1.1</math></b> | <b><math>35 \pm 4.2</math></b> |

Dosimetry estimates are based on a 70-kg human male

Data represents mean  $\pm$  SD
